# Supplementary material
Source: PubMed Central journal article supplement (PMC4787890)
Supplement: jamd693325.wt1_default.pdf [file jamd693325.wt1_default.pdf]

**Web table A** Correlation matrix between UKCAT scores and A-level total tariff scores

|                                        |                                 | <b>Score for<br/>Verbal<br/>Reasoning</b> | <b>Score for<br/>Quantitative<br/>Reasoning</b> | <b>Score for<br/>Abstract<br/>Reasoning</b> | <b>Score for<br/>Decision<br/>Analysis</b> | <b>Total score<br/>for all<br/>Sections</b> | <b>A-levels<br/>total tariff</b> | <b>A-levels total<br/>science tariff</b> |
|----------------------------------------|---------------------------------|-------------------------------------------|-------------------------------------------------|---------------------------------------------|--------------------------------------------|---------------------------------------------|----------------------------------|------------------------------------------|
| Score for<br>Verbal<br>Reasoning       | Correlation<br>Coefficient<br>N | 1<br>9884                                 |                                                 |                                             |                                            |                                             |                                  |                                          |
| Score for<br>Quantitative<br>Reasoning | Correlation<br>Coefficient<br>N | 0.406 (***)<br>9884                       | 1<br>9884                                       |                                             |                                            |                                             |                                  |                                          |
| Score for<br>Abstract<br>Reasoning     | Correlation<br>Coefficient<br>N | 0.288 (***)<br>9884                       | 0.311 (***)<br>9884                             | 1<br>9884                                   |                                            |                                             |                                  |                                          |
| Score for<br>Decision<br>Analysis      | Correlation<br>Coefficient<br>N | 0.363 (***)<br>9884                       | 0.304 (***)<br>9884                             | 0.357 (***)<br>9884                         | 1<br>9884                                  |                                             |                                  |                                          |
| A-levels<br>total tariff               | Correlation<br>Coefficient<br>N | 0.295 (***)<br>9884                       | 0.300 (***)<br>9884                             | 0.267 (***)<br>9884                         | 0.273 (***)<br>9884                        | 0.392 (***)<br>9884                         | 1<br>9884                        |                                          |
| A-levels<br>total<br>science<br>tariff | Correlation<br>Coefficient<br>N | 0.215 (***)<br>9884                       | 0.322 (***)<br>9884                             | 0.268 (***)<br>9884                         | 0.239 (***)<br>9884                        | 0.357 (***)<br>9884                         | 0.668 (***)<br>9884              | 1<br>9884                                |

\*\*\* Spearman correlation coefficient, significant at,  $p < 0.001$  (2-tailed).
