# Supplementary material
Source: PubMed Central journal article supplement (PMC4787890)
Supplement: jamd693325.wt2_default.pdf [file jamd693325.wt2_default.pdf]

**Web table B** Descriptive statistics and Mann Whitney tests of UKCAT and A-level scores against binary socio-economic variables

|                                        | <b>Score for<br/>Verbal<br/>Reasoning</b> | <b>Score for<br/>Quantitative<br/>Reasoning</b> | <b>Score for<br/>Abstract<br/>Reasoning</b> | <b>Score for<br/>Decision<br/>Analysis</b> | <b>Total score<br/>for all<br/>Sections</b> | <b>A-levels<br/>total tariff</b> | <b>A-levels<br/>total<br/>science<br/>tariff *</b> | <b>A-levels<br/>average<br/>tariff<br/>score</b> | <b>A-levels<br/>average<br/>science<br/>tariff *</b> |
|----------------------------------------|-------------------------------------------|-------------------------------------------------|---------------------------------------------|--------------------------------------------|---------------------------------------------|----------------------------------|----------------------------------------------------|--------------------------------------------------|------------------------------------------------------|
| <b>Gender (n=9884)</b>                 |                                           |                                                 |                                             |                                            |                                             |                                  |                                                    |                                                  |                                                      |
| Male                                   | 600 (550-660)                             | 630 (580-670)                                   | 600 (560-650)                               | 590 (530-660)                              | 2440 (2280-2590)                            | 360 (320-440)                    | 340 (240-360)                                      | 115 (107-120)                                    | 115 (107-120)                                        |
| Female                                 | 600 (530-650)                             | 600 (560-640)                                   | 610 (560-660)                               | 590 (530-660)                              | 2400 (2240-2560)                            | 360 (320-400)                    | 280 (220-360)                                      | 113 (107-120)                                    | 113 (100-120)                                        |
| Z                                      | -8.24                                     | -18.09                                          | -5.11                                       | -1.35                                      | -7.27                                       | -5.07                            | -15.52                                             | -2.19                                            | -3.22                                                |
| Asymp. Sig. (2-tailed)                 | <0.001                                    | <0.001                                          | <0.001                                      | 0.176                                      | <0.001                                      | <0.001                           | <0.001                                             | 0.028                                            | 0.001                                                |
| <b>Ethnicity (n=9735)</b>              |                                           |                                                 |                                             |                                            |                                             |                                  |                                                    |                                                  |                                                      |
| White                                  | 620 (570-660)                             | 620 (580-660)                                   | 610 (560-660)                               | 620 (550-670)                              | 2460 (2320-2610)                            | 360 (340-440)                    | 320 (240-360)                                      | 115 (107-120)                                    | 120 (107-120)                                        |
| Non-White                              | 570 (510-620)                             | 600 (550-640)                                   | 600 (550-650)                               | 580 (520-640)                              | 2350 (2160-2500)                            | 360 (320-400)                    | 320 (220-360)                                      | 113 (100-120)                                    | 113 (100-120)                                        |
| Z                                      | -28.83                                    | -13.71                                          | -9.41                                       | -18.05                                     | -24.41                                      | -10.19                           | -1.05                                              | -12.78                                           | -12.71                                               |
| Asymp. Sig. (2-tailed)                 | <0.001                                    | <0.001                                          | <0.001                                      | <0.001                                     | <0.001                                      | <0.001                           | 0.390                                              | <0.001                                           | <0.001                                               |
| <b>Socio-economic status (n= 7005)</b> |                                           |                                                 |                                             |                                            |                                             |                                  |                                                    |                                                  |                                                      |
| Professional/managerial                | 610 (560-660)                             | 620 (570-660)                                   | 610 (560-660)                               | 620 (550-660)                              | 2450 (2300-2600)                            | 360 (340-440)                    | 320 (240-360)                                      | 115 (107-120)                                    | 120 (107-120)                                        |
| All other groups                       | 580 (530-640)                             | 610 (560-640)                                   | 600 (560-650)                               | 590 (530-640)                              | 2380 (2230-2540)                            | 360 (320-380)                    | 300 (220-360)                                      | 113 (100-120)                                    | 113 (100-120)                                        |
| Z                                      | -8.61                                     | -5.90                                           | -4.84                                       | -7.99                                      | -9.51                                       | -7.43                            | -4.23                                              | -8.41                                            | -8.26                                                |

|                                      |                   |                   |                   |                   |                      |                   |                   |                   |                   |
|--------------------------------------|-------------------|-------------------|-------------------|-------------------|----------------------|-------------------|-------------------|-------------------|-------------------|
| Asymp. Sig. (2-tailed)               | <0.001            | <0.001            | <0.001            | <0.001            | <0.001               | <0.001            | <0.001            | <0.001            | <0.001            |
| Schooling<br>(n=9790)                |                   |                   |                   |                   |                      |                   |                   |                   |                   |
| Independent/<br>Grammar<br>schooling | 610 (560-<br>660) | 620 (580-<br>670) | 620 (570-<br>680) | 620 (550-<br>670) | 2460 (2320-<br>2610) | 360 (340-<br>460) | 340 (240-<br>360) | 120 (110-<br>120) | 120 (110-<br>120) |
| All other<br>schooling               | 580 (530-<br>650) | 600 (560-<br>640) | 600 (550-<br>650) | 580 (520-<br>640) | 2380 (2210-<br>2540) | 360 (320-<br>400) | 300 (220-<br>360) | 113 (100-<br>120) | 110 (100-<br>120) |
| Z                                    | -12.07            | -13.90            | -13.11            | -14.08            | -18.13               | -15.22            | -12.98            | -21.86            | -21.03            |
| Asymp. Sig. (2-tailed)               | <0.001            | <0.001            | <0.001            | <0.001            | <0.001               | <0.001            | <0.001            | <0.001            | <0.001            |

All UKCAT and A-level point scores are shown as median (inter-quartile range) Using the Bonferroni correction for multiple comparisons, only values of  $p < 0.005$  are considered significant

\*21 students had no recorded passes in science A-levels, therefore 'n' is slightly lower in each case.
